# Supplementary material
Source: Springer Nature journal article supplement (https://www.springermedizin.de/resource/supplementary/12939_2010_166_MOESM6_ESM.pdf/9551632)

a. Delivery by caesarean section

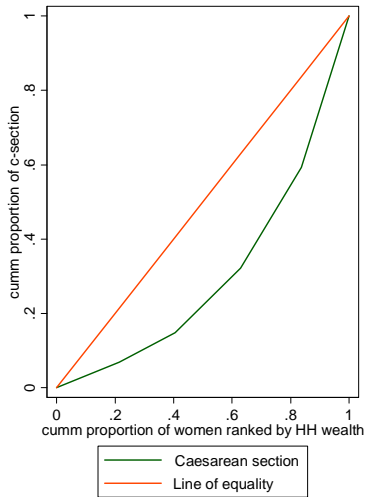

b. Postnatal checkup

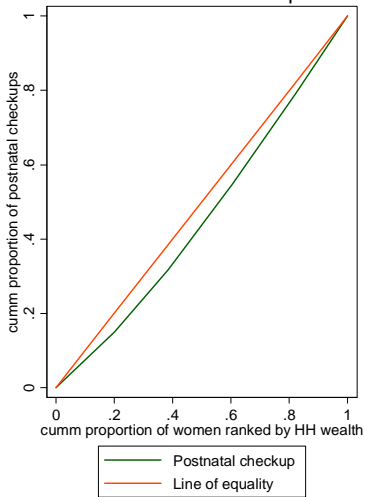

Supplement: MOESM6 [file 9551632]
